# Supplementary material for: Chromium interactions in plants: current status and future strategies
Source: Royal Society of Chemistry journal article supplement (doi:10.1039/b904571f), 2009-01-01
Supplement: b904571f.pdf [file b904571f.pdf]

## List of abbreviations

μ-PIXE - Micro-proton-induced X-ray emission

XANES - X-ray absorption near-edge structure spectroscopy

XANES- X-ray absorption spectroscopy

HPLC - High performance liquid chromatography

ICP-MS- Inductively coupled plasma mass spectrometry

LA-ICP-MS- Laser Ablution Inductively coupled plasma mass spectrometry

EXAFS- Extended X-ray absorption fine structure

GSH- glutathione sulphydryl (Reduced Glutathione)

GSSG- glutathione disulfide (Oxidised Glutathione)

NADPH- Nicotinamide Adenine Dinucleotide Phosphate (reduced)

PS II- Photosystem –II

Fv/Fm- Variable fluorescence / Maximum fluorescence

ATP- Adenosine Tri Phosphate

DNA- Deoxyribo Nucleic Acid

RNA- Ribo Nucleic Acid

cDNA- Complementary Deoxyribo Nucleic Acid

cRNA- Complementary Ribo Nucleic Acid

MSAP- Methylation-Sensitive Amplified Polymorphism

AFLP-Amplified fragment length polymorphism

RT-PCR- Reverse Transcriptase Polymerase Chain Reaction

NCBI- National Center for Biotechnology Information

PlantGDB- Plant Genome Database

LPD2- Dihydrolipoyl dehydrogenase/oxidoreductase

FAD- Flavin Adenine Dinucleotide

Electronic Supplementary Information for Metallomics

This journal is © The Royal Society of Chemistry 2009

BLAST- Basic Local Alignment Search Tool

PDB- Protein Data Bank

NQR- NAD(P)H:quinone oxidoreductase

WGA- Whole Genome Array

2D-GE - 2 Dimensional Gel Electrophoresis

MALDI-TOFMS- Matrix-Assisted Laser Desorption/Ionization with Time-Of-Flight Mass Spectrometry

PCA- Principal Component Analysis

HCA- Hierarchical Clustering Analysis

BL-SOM - Batch-Learning Self-Organizing Map

### **Gene names**

BjST1- Brassica juncea Sulphate Transporter 1 (gene)

atps6- ATP-sulfurylase 6

apsr2- APS-reductase 2

gsh2- Glutathione synthetase 2
